# Supplementary material for: Comparative transcriptomic characterization of aluminum, sodium chloride, cadmium and copper rhizotoxicities in Arabidopsis thaliana
Source: PubMed Central journal article supplement (PMC2666732; doi:10.1186/1471-2229-9-32), 2009-03-23

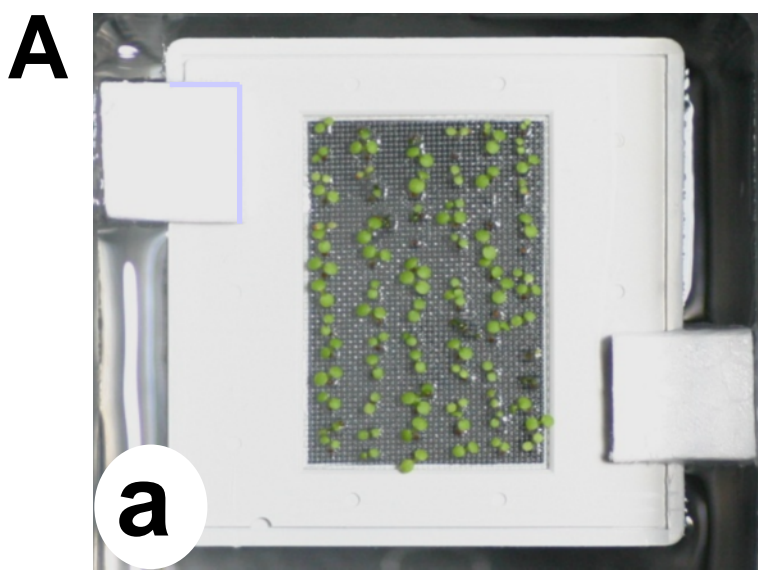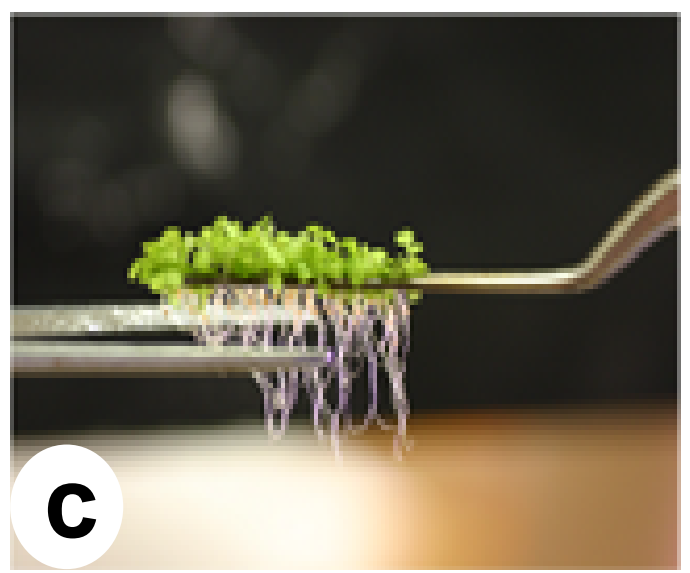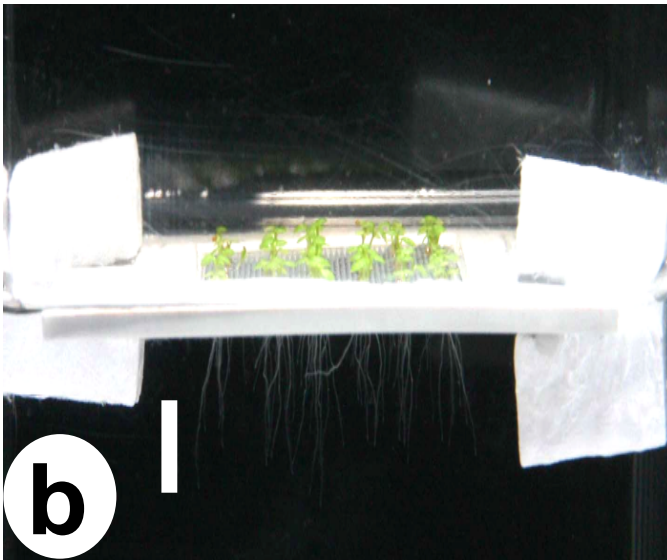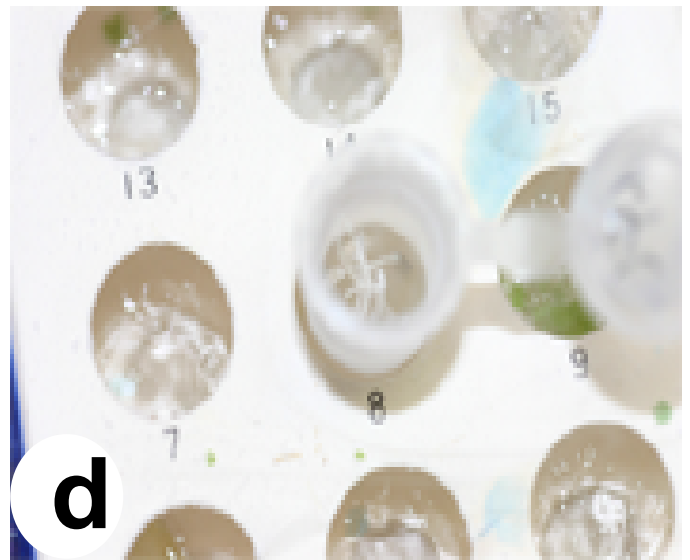

**B** **FDA**

**PI**

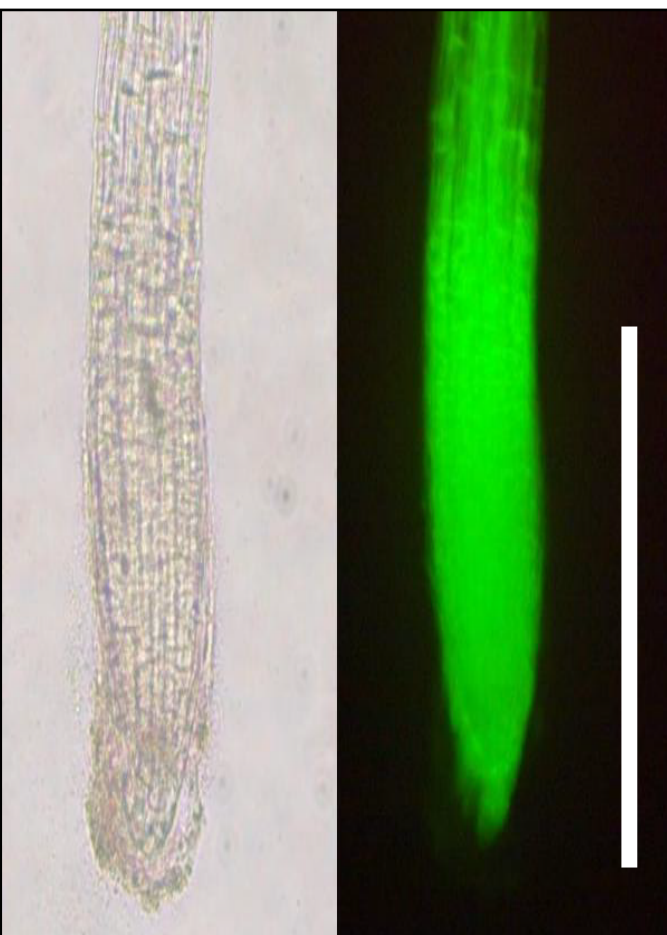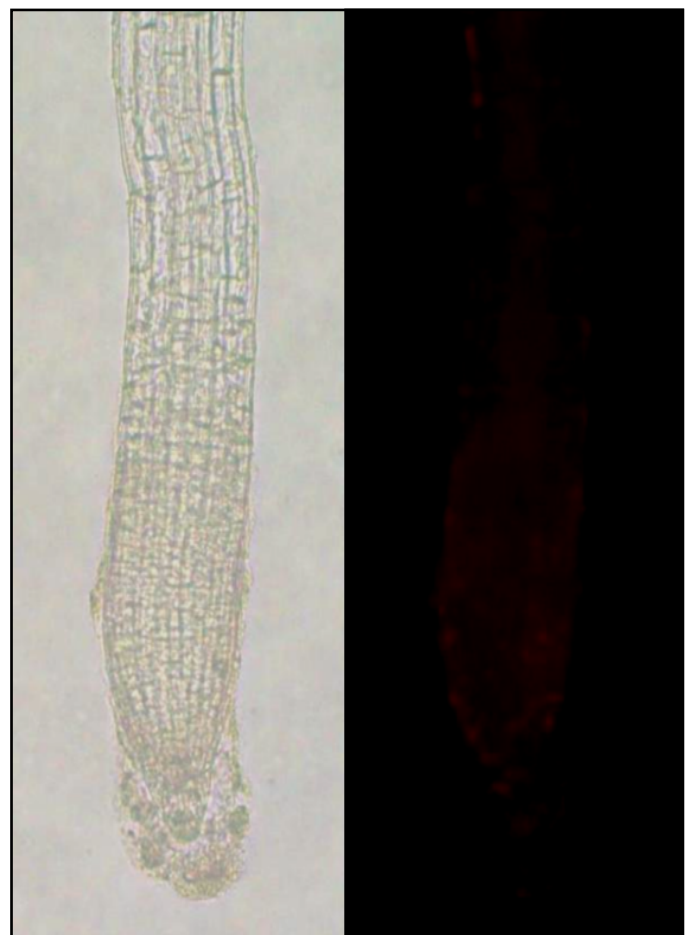

Supplement: 1471-2229-9-32-S1.pdf [file 1471-2229-9-32-S1.pdf]
