# Supplementary material for: Comparative transcriptomic characterization of aluminum, sodium chloride, cadmium and copper rhizotoxicities in Arabidopsis thaliana
Source: PubMed Central journal article supplement (PMC2666732; doi:10.1186/1471-2229-9-32), 2009-03-23

**FDA**

**PI**

**Al**

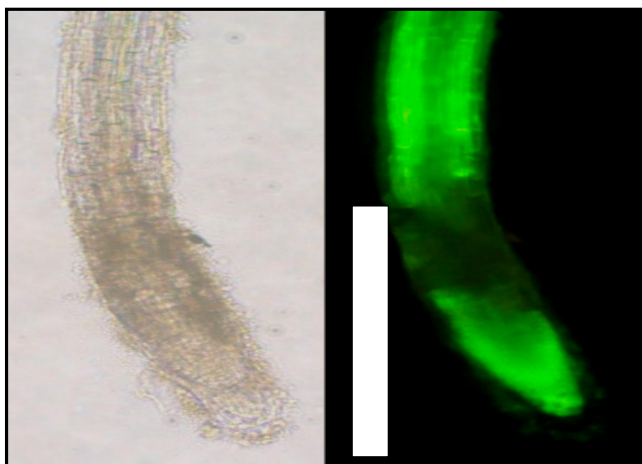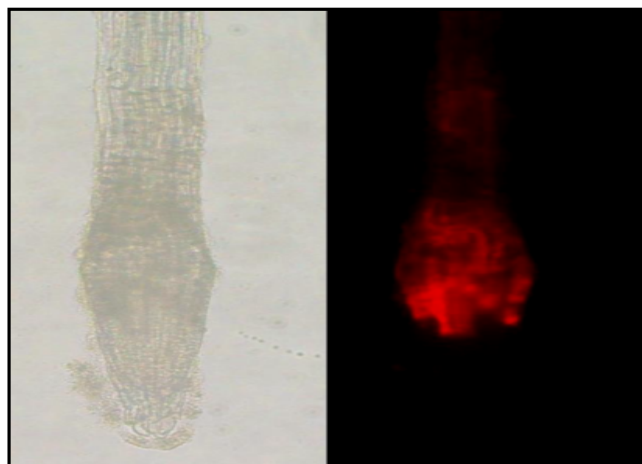

**NaCl**

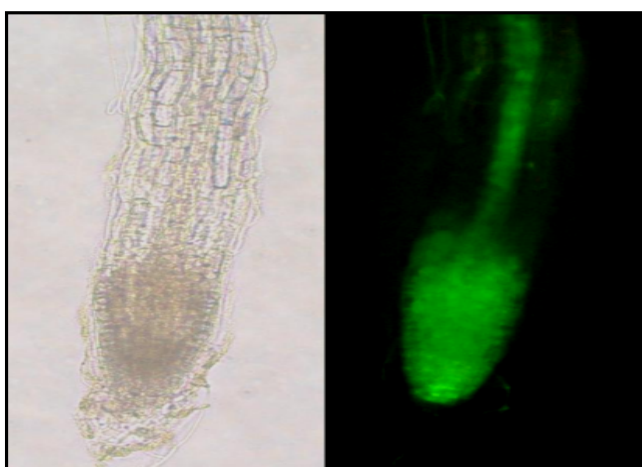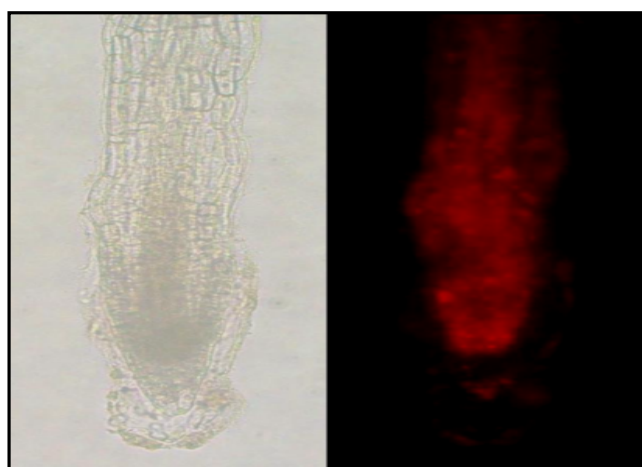

**Cd**

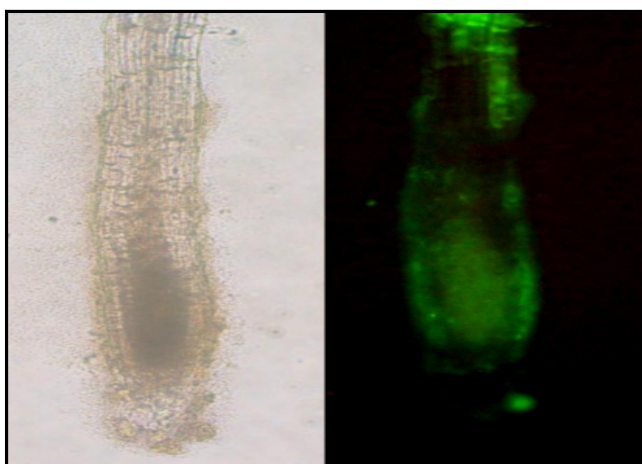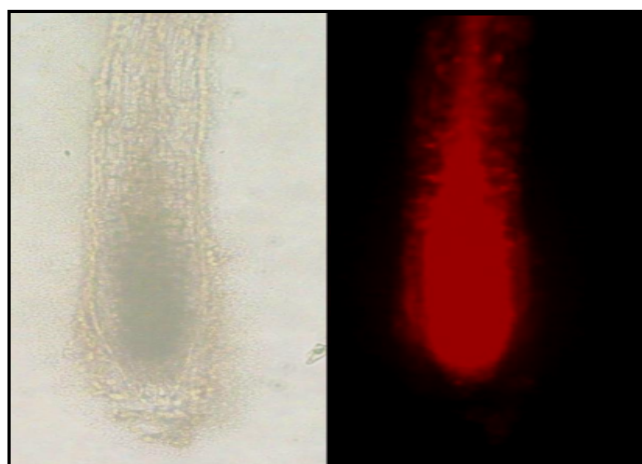

**Cu**

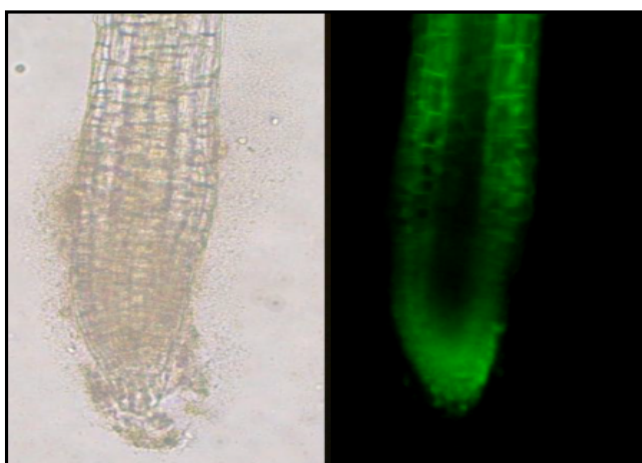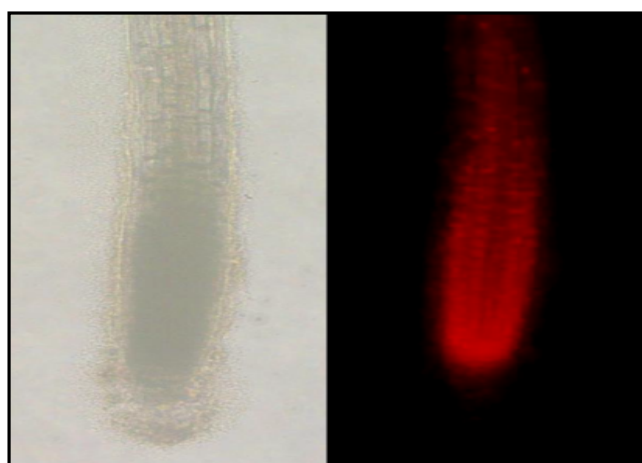

Supplement: 1471-2229-9-32-S2.pdf [file 1471-2229-9-32-S2.pdf]
